# Supplementary material
Source: PubMed Central journal article supplement (PMC3396506)
Supplement: 1200313109_pnas.201200313SI.pdf [file 1200313109_pnas.201200313SI.pdf]

# Supporting Information

Bartholomew et al. 10.1073/pnas.1200313109

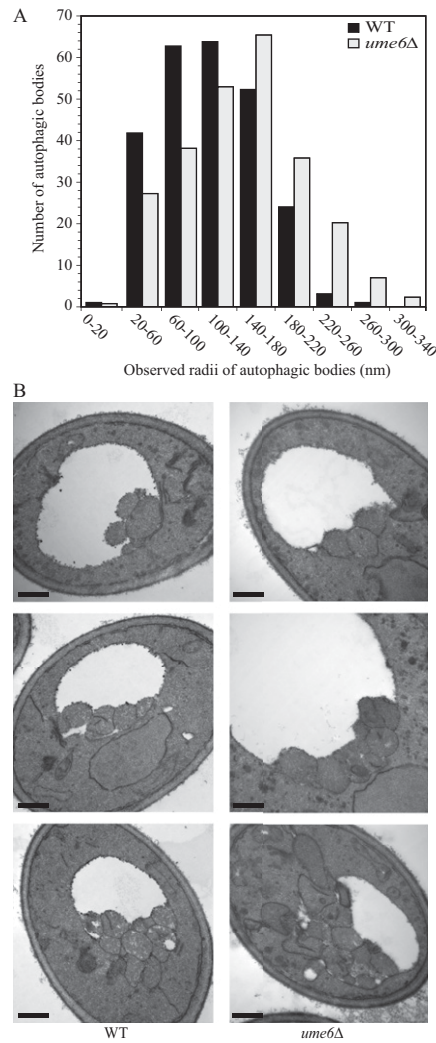

**Fig. S1.** Autophagosome volume is increased in *ume6Δ* cells. (A) Wild-type (FRY143, SEY6210) and *ume6Δ* (YCB234) strains with *vps4Δ* and *pep4Δ* deletions to eliminate vesicles generated from the multivesicular body pathway and the breakdown of autophagic bodies, respectively, were grown in rich medium and starved in SD-N for 1 h. Samples were collected, prepared, and examined by TEM as described in *Materials and Methods*. The radius of each autophagosome was determined as described in *Materials and Methods*. The error represents the SEM for >225 autophagic bodies. (B) Supplemental images for Fig. 4C. Wild-type (FRY143, SEY6210) and *ume6Δ* (YCB234) strains were grown as above and starved in SD-N for 2 h. Samples were collected, prepared, and examined by TEM as described in *Materials and Methods*. (Scale bars: 500 nm.)

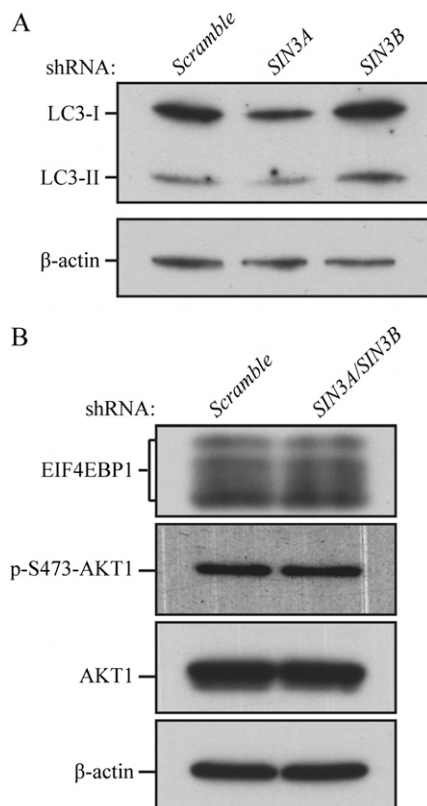

**Fig. S2.** SIN3A and SIN3B play redundant roles in regulating LC3 expression. (A) *SIN3A*- and *SIN3B*-targeted shRNA was prepared and used to generate viruses as described in *Materials and Methods*. The shRNA-expressing viruses were singly infected into HeLa cells using scrambled DNA as a control. Cell lysates were analyzed by immunoblotting with anti-LC3 and anti-actin antiserum (the latter as a loading control). (B) *SIN3A* and *SIN3B* were knocked down in combination, and cell lysates were analyzed with the indicated antibodies.

**Table S1. Strains used in this study**

| Strain                          | Genotype                                                                                                                                                    | Source     |
|---------------------------------|-------------------------------------------------------------------------------------------------------------------------------------------------------------|------------|
| BY4742                          | <i>MAT<math>\alpha</math> his3<math>\Delta</math>1 leu2<math>\Delta</math>0 ura3<math>\Delta</math>0</i>                                                    | Invitrogen |
| FRY143                          | <i>SEY6210 pep4<math>\Delta</math>::LEU2 vps4<math>\Delta</math>::TRP1</i>                                                                                  | 1          |
| <i>rim15<math>\Delta</math></i> | <i>BY4742 rim15<math>\Delta</math>::KanMX6</i>                                                                                                              | Invitrogen |
| <i>rdp3<math>\Delta</math></i>  | <i>BY4742 rpd3<math>\Delta</math>::KanMX6</i>                                                                                                               | Invitrogen |
| SEY6210                         | <i>MAT<math>\alpha</math> his3<math>\Delta</math>200 leu2-3,112 lys2-801 suc2-<math>\Delta</math>9 trp1<math>\Delta</math>901 ura3-52</i>                   | 2          |
| <i>sin3<math>\Delta</math></i>  | <i>BY4742 sin3<math>\Delta</math>::KanMX6</i>                                                                                                               | Invitrogen |
| <i>ume6<math>\Delta</math></i>  | <i>BY4742 ume6<math>\Delta</math>::KanMX6</i>                                                                                                               | Invitrogen |
| W303-1B                         | <i>MAT<math>\alpha</math> ade2-1 his3-11,15 leu2,3,112 trp1-1 ura3-1 can1-100</i>                                                                           | 3          |
| YCB193                          | <i>SEY6210 pho8::pho8<math>\Delta</math>60 pho13<math>\Delta</math></i>                                                                                     | This Study |
| YCB194                          | <i>SEY6210 atg1<math>\Delta</math>::HIS3 pho8::pho8<math>\Delta</math>60 pho13<math>\Delta</math></i>                                                       | This Study |
| YCB197                          | <i>SEY6210 ume6<math>\Delta</math>::HIS3 pho8::pho8<math>\Delta</math>60 pho13<math>\Delta</math></i>                                                       | This Study |
| YCB234                          | <i>SEY6210 pep4<math>\Delta</math>::LEU2 vps4<math>\Delta</math>::TRP1 ume6<math>\Delta</math>::KanMX6</i>                                                  | This Study |
| YZD005                          | <i>W303-1B pep4<math>\Delta</math>::URA3 pho13<math>\Delta</math> pho8<math>\Delta</math>60</i>                                                             | This Study |
| YZD006                          | <i>W303-1B pep4<math>\Delta</math>::URA3 pho13<math>\Delta</math> pho8<math>\Delta</math>60 rim15<math>\Delta</math>::BLE</i>                               | This Study |
| YZD007                          | <i>W303-1B pep4<math>\Delta</math>::URA3 pho13<math>\Delta</math> pho8<math>\Delta</math>60 rim15<math>\Delta</math>::BLE ume6<math>\Delta</math>::HIS3</i> | This Study |

- Cheong H, et al. (2005) Atg17 regulates the magnitude of the autophagic response. *Mol Biol Cell* 16:3438–3453.
- Robinson JS, Kliensky DJ, Banta LM, Emr SD (1988) Protein sorting in *Saccharomyces cerevisiae*: Isolation of mutants defective in the delivery and processing of multiple vacuolar hydrolases. *Mol Cell Biol* 8:4936–4948.
- Thomas BJ, Rothstein R (1989) Elevated recombination rates in transcriptionally active DNA. *Cell* 56:619–630.
